# Supplementary material for: Detection of microplastics in Litopenaeus vannamei (Penaeidae) and Macrobrachium rosenbergii (Palaemonidae) in cultured pond
Source: PeerJ. 2022 Feb 8;10:e12916. doi: 10.7717/peerj.12916 (PMC8833223; doi:10.7717/peerj.12916)
Supplement: Supplemental Information 1 [file peerj-10-12916-s001.xlsx]

## Sheet: Sheet1
Litopenaeus vannamei
	Rep.	item		Fibre	item			Color	item	%
	1	9		Black	5			Black	29	0.1758
	2	17		Red	12			Red	14	0.0848
	3	5		Blue	6			Transparent	81	0.4909
	4	23						Blue	11	0.0667
	5	8		Transparent	44			Yellow	29	0.1758
	6	10		Yellow	8
	7	10		Green	1			Green	1	0.0061
	8	14		Total	76	0.4606		Total	165	1.0001
	9	12
	10	11		Film	item
	11	12		Total	14	0.0848
	12	10
	13	4		Fragment	item
	14	9		Transparent	23
	15	11		Blue	5
	Total	165		Black	24
	Ave./Species	11		Red	2
				Yellow	21
				Total	75	0.4545
Macrobrachium resenbergii_male
	Rep.	item		Fibre	item			Color	item	%
	1	39		Black	44			Black	48	0.1026
	2	47		Red	7			Red	14	0.0299
	3	27		Blue	27			Transparent	302	0.6453
	4	69						Blue	43	0.0919
	5	38		Transparent	278			Yellow	59	0.1261
	6	12		Yellow	16
	7	20		Green	2			Green	2	0.0043
	8	21		Total	374	0.7991		Total	468	1.0001
	9	72
	10	29		Film	item
	11	12		รวม	14	0.0299
	12	36
	13	13		Fragment	item
	14	33		Transparent	8
	Total	468		Blue	16
	Avg./Species	33.4286		Black	4
				Red	7
				Yellow	43
				Total	78	0.1667
				Sphere	item
				Total	2	0.0043
Macrobrachium rosenbergii_female
	Rep.	item		Fibre	item			Fragment	item
	1	27		Black	21			Transparent	13
	2	20		Red	12			Blue	4
	3	66		Blue	7			Black	29
	4	22						Red	16
	5	59		Transparent	399			Yellow	23
	6	32		Yellow	5			Total	85	0.1595
	7	15		Green	0
	8	11		Total	444	0.833
	9	20						Color	item	%
	10	74						Black	50	0.0938
	11	40		Fragment	item			Red	28	0.0525
	12	36		Total	2	0.0038		Transparent	416	0.7805
	13	16						Blue	11	0.0206
	14	37		Sphere	item			Yellow	28	0.0525
	15	13		Total	2	0.0038
	16	45						Green	0	0
	Total	533						Total	533	0.9999
	Avg./Species	33.3125
Total microplastic found in Macrobrachium rosenbergii and Litopenaeus vannamei
	Color	item	%
	Black	127	0.1089
	Red	56	0.048
	Transparent	799	0.6852
	Blue	65	0.0557
	Yellow	116	0.0995
	Green	3	0.0026
	Total	1166	0.9999
	Fiber	item	%
	Black	70
	Red	31
	Blue	40
	Transparent	721
	Yellow	29
	Green	3
	Total	894	0.7667
	Film	item	%
	Total	30	0.0257
	Fragment	item	%
	Transparent	44
	Blue	25
	Black	57
	Red	25
	Yellow	87
	Total	238	0.2041
	Sphere	item	%
	Total	4	0.0034
Litopenaeus vannamei						Macrobrachium rosenbergii_female
	Size	item	%				Size	item	%
	250	63	0.3818				250	36	0.0694
	250-500	25	0.1515				250-500	165	0.3096
	500-1	61	0.3697				500-1	289	0.5422
	1mm-5mm	16	0.097				1mm-5mm	42	0.0807
	Total	165	1				Total	532	1.0019
Macrobrachium rosenbergii_male							L. vannamei	Male M. rosenbergii	Female M. rosenbergii
	Size	item	%			<0.25	63	106	36
	250	106	0.2265			0.25-0.5	25	69	165
	250-500	69	0.1474			0.5-1.0	61	255	289
	500-1	255	0.5449			1.0-5.0	16	38	42
	1mm-5mm	38	0.0812
	Total	468	1
